# Supplementary material for: Humanized-VHH Transbodies that Inhibit HCV Protease and Replication
Source: MDPI journal article supplement (doi:10.3390/v7042030), 2015-04-20
Supplement: s1 [file s1]

# Supplementary Information

**Supplemental data 1.** The quality criteria of the NS3/4A models.

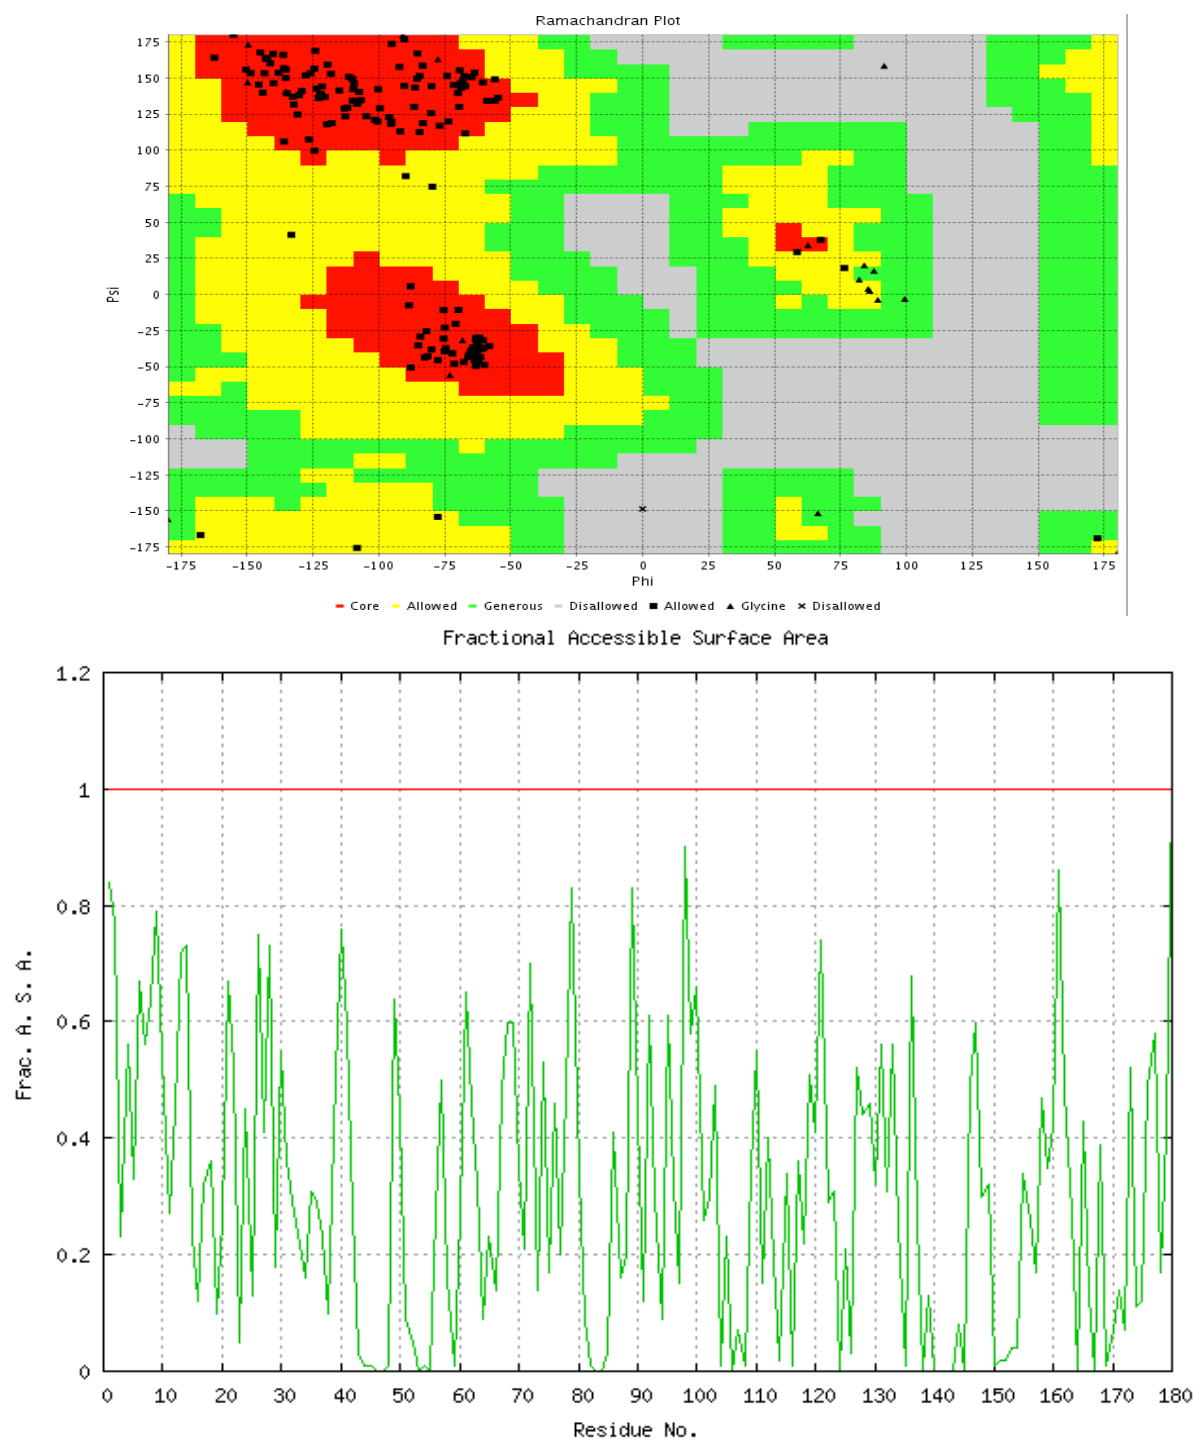

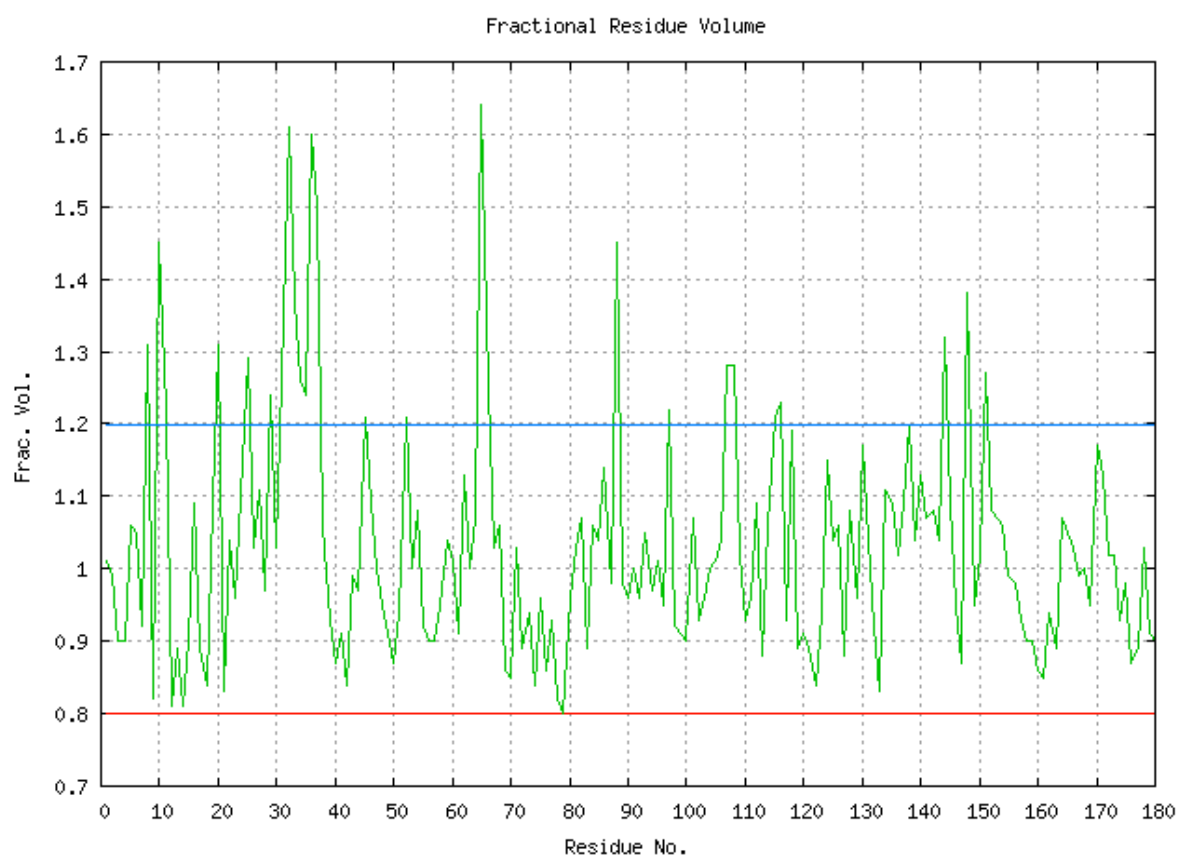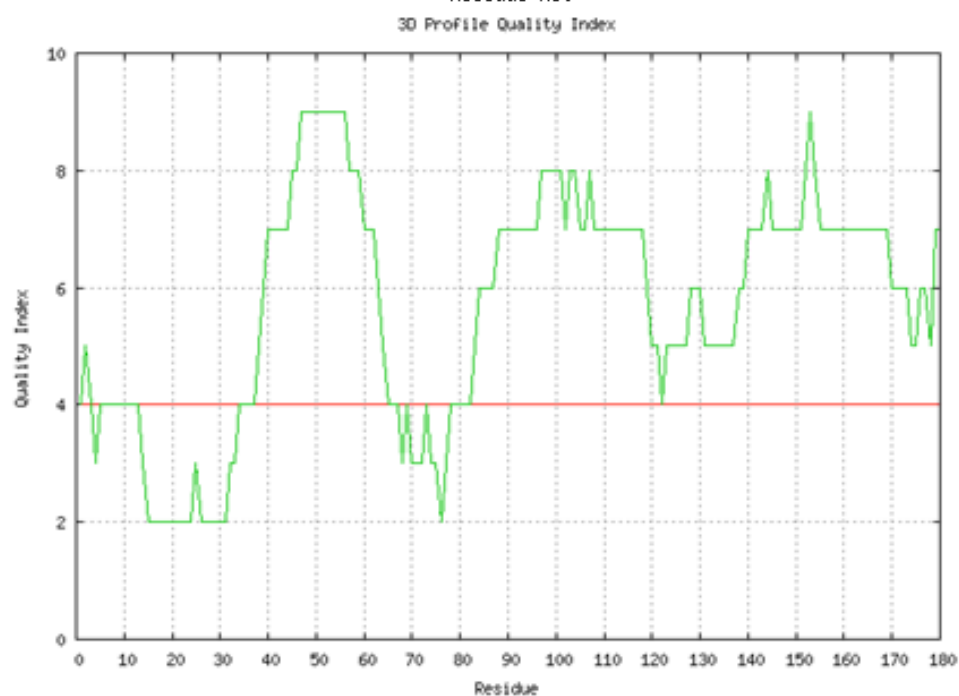

**Supplemental data 2.** Top five clusters of interaction between the modeled NS3/4A and nanobody provided by the server

Graphical representations of the HADDOCK- clone V<sub>H</sub>H24

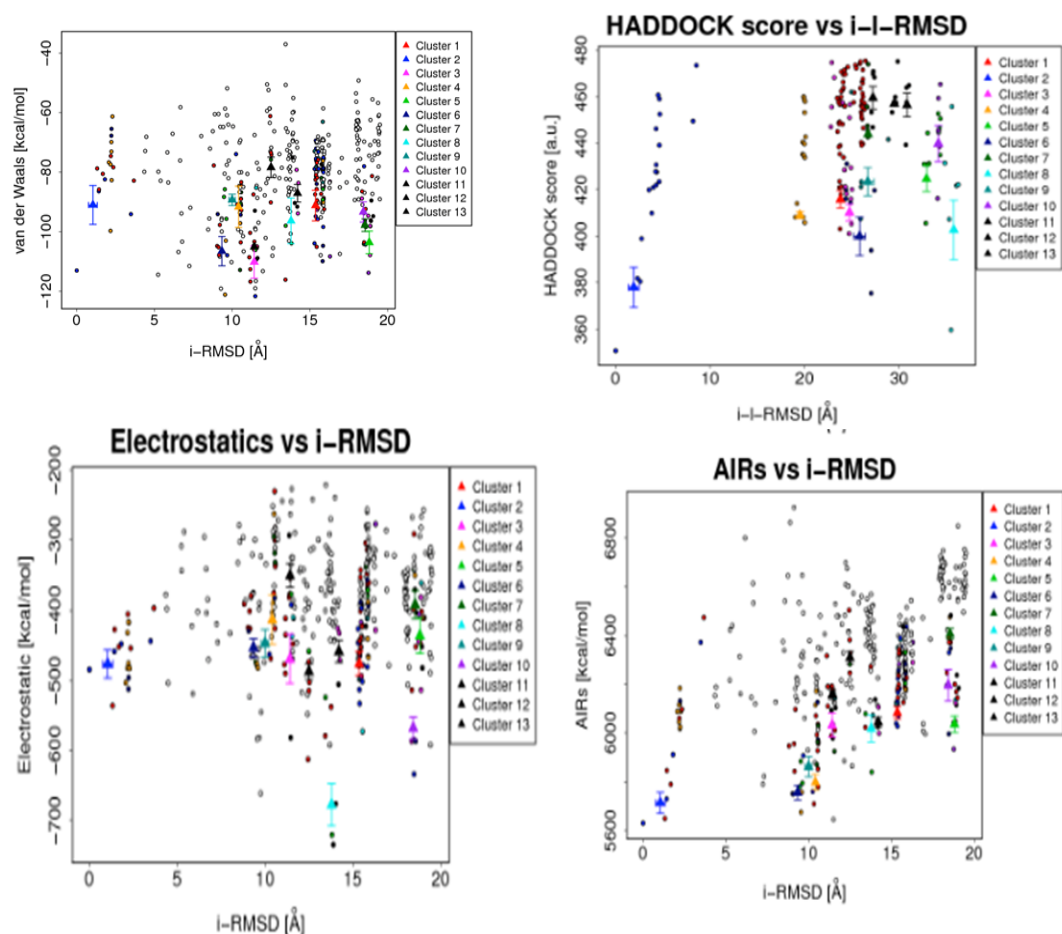

Clusters of NS3/4A- V<sub>H</sub>H24

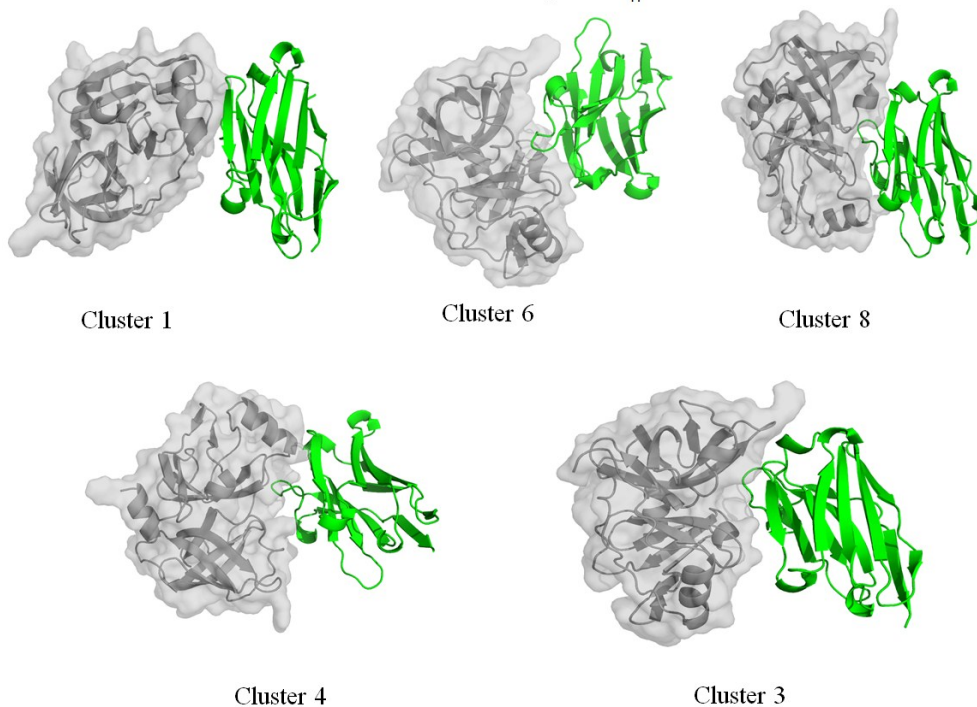

Graphical representations of the HADDOCK- clone V<sub>H</sub>H28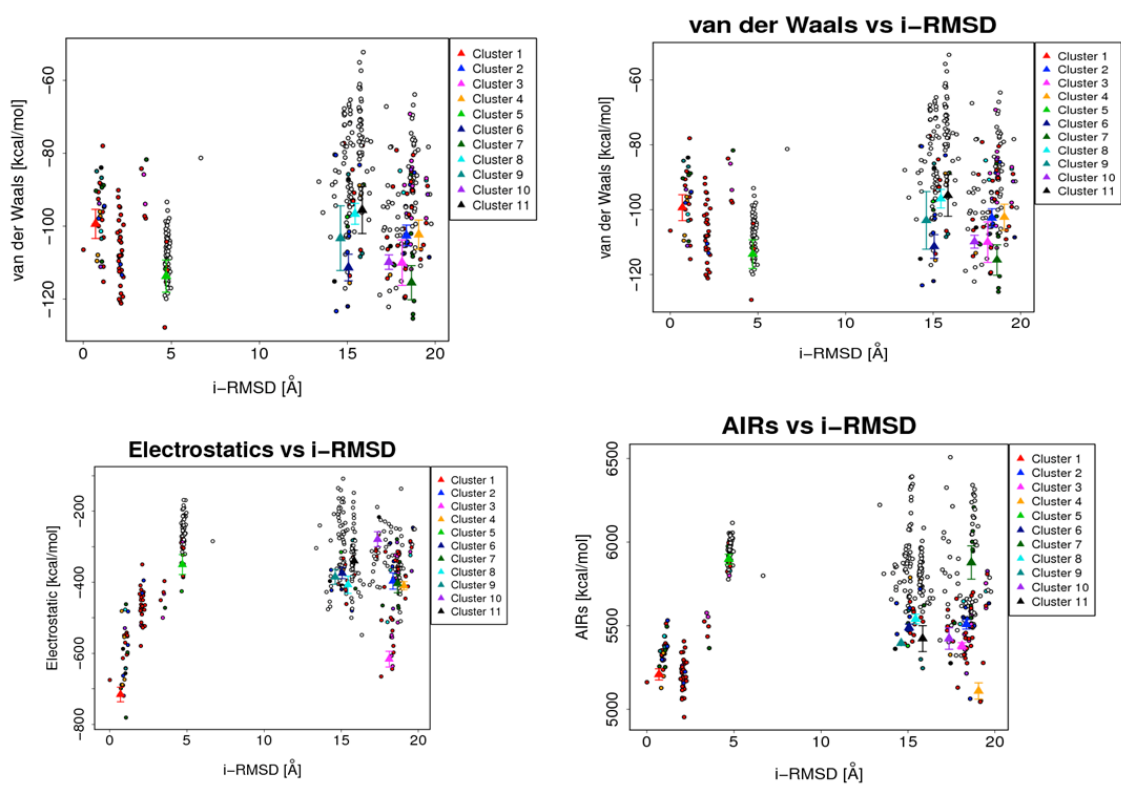Clusters of NS3/4A-VH<sub>H</sub>28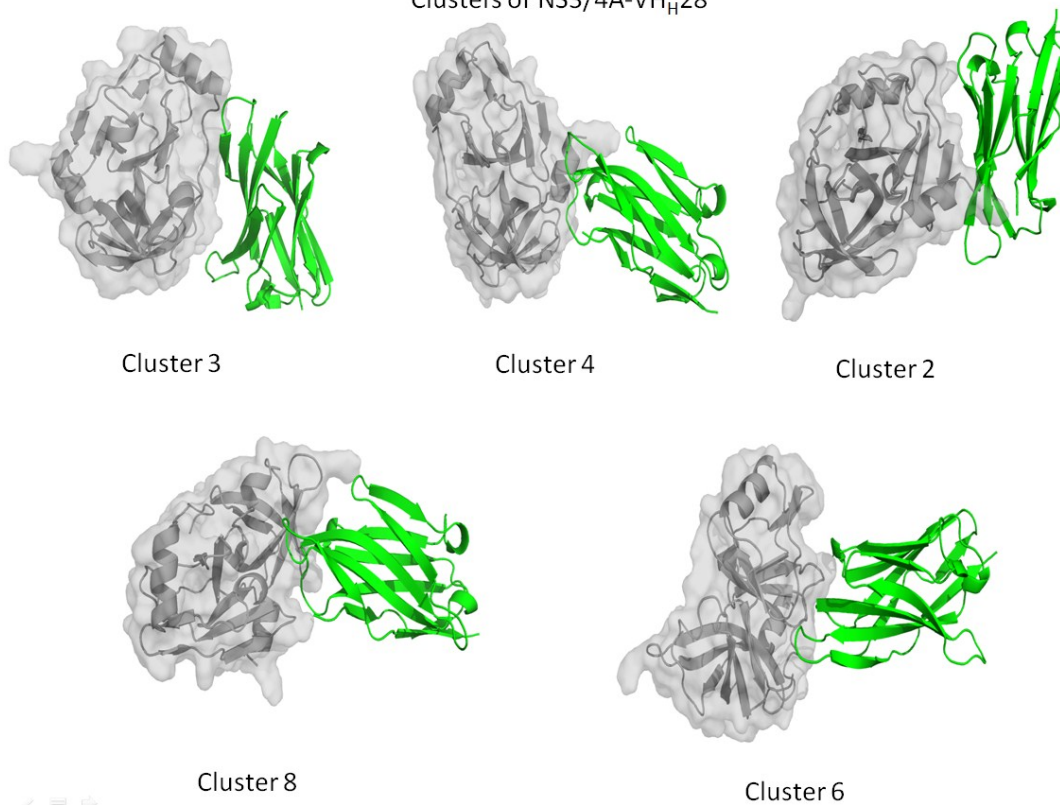

Graphical representations of the HADDOCK- clone V<sub>H</sub>H41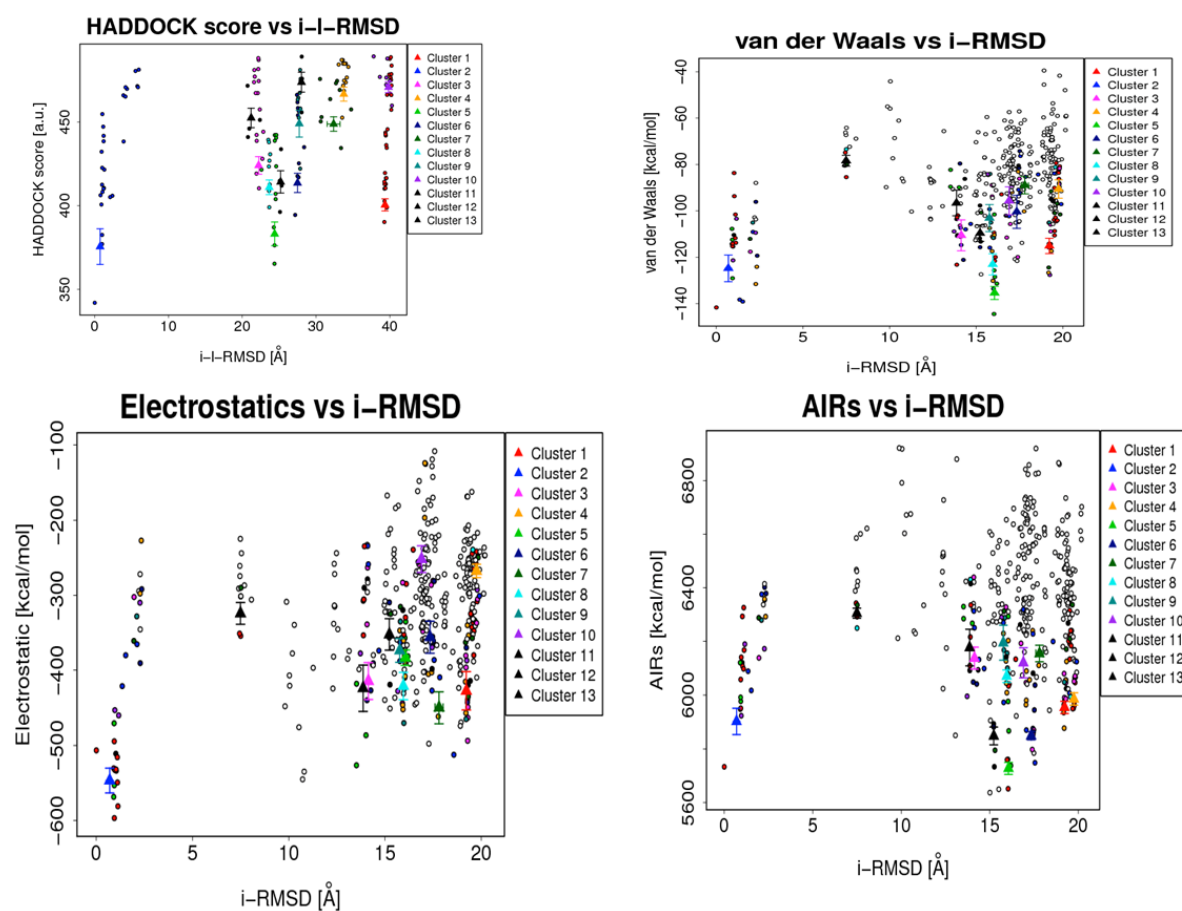Clusters of NS3/4A-VH<sub>H</sub>41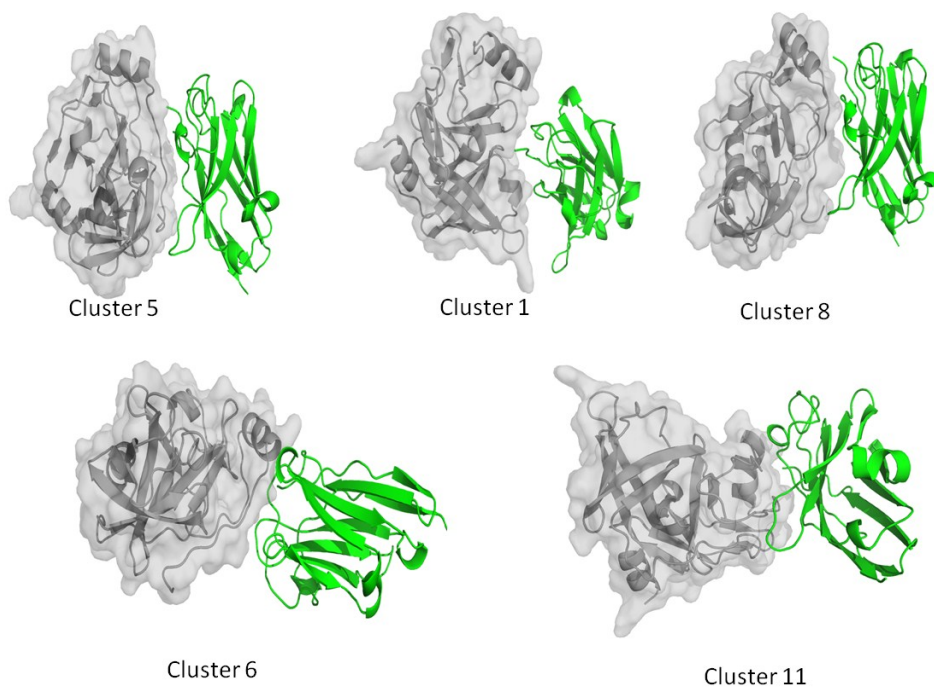

**Supplemental data 3.** Modeled structure of NS3/4A showing catalytic triad, oxyanion loop and S1 pocket.

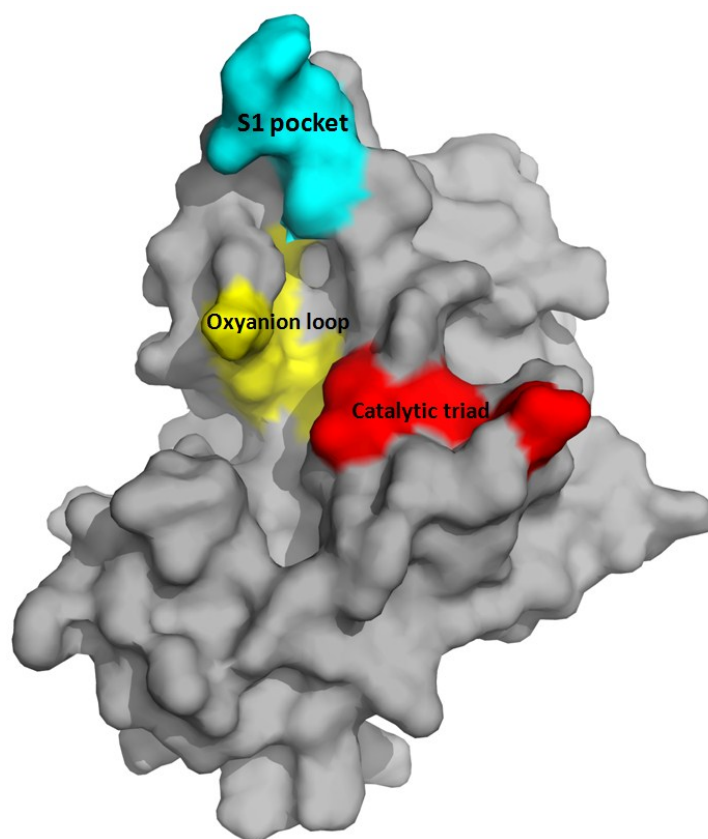

© 2015 by the authors; licensee MDPI, Basel, Switzerland. This article is an open access article distributed under the terms and conditions of the Creative Commons Attribution license (<http://creativecommons.org/licenses/by/3.0/>).
